# Supplementary material for: Protein-mediated disproportionation of Au(i): insights from the structures of adducts of Au(iii) compounds bearingN,N-pyridylbenzimidazole derivatives with lysozyme
Source: Royal Society of Chemistry journal article supplement (doi:10.1039/c9dt02729g), 2019-01-01
Supplement: c9dt02729g2.pdf [file c9dt02729g2.pdf]

SUPPORTING INFO

**Protein-mediated disproportionation of Au(I): insights from the structures of adducts of Au(III) compounds bearing N,N-pyridylbenzimidazole derivatives with lysozyme**

Giarita Ferraro,<sup>a</sup> Anna Giorgio,<sup>b</sup> Ahmed M. Mansour,<sup>c,d</sup> and Antonello Merlino<sup>b\*</sup>

---

**Table S1. Data collection and refinement statistics**

| Data collection                     | HEWL-1                           | HEWL-1                           | HEWL-1                           | HEWL-2                           | HEWL-2                           |
|-------------------------------------|----------------------------------|----------------------------------|----------------------------------|----------------------------------|----------------------------------|
| Soaking time                        | 21 h                             | 24 h                             | 3 days                           | 21 h                             | 24 h                             |
| Space group                         | P4 <sub>3</sub> 2 <sub>1</sub> 2 |
| Wavelength (Å)                      | 1.5418                           | 1.5418                           | 1.5418                           | 1.5418                           | 1.5418                           |
| Unit cell parameter                 |                                  |                                  |                                  |                                  |                                  |
| a (Å)                               | 76.953                           | 78.328                           | 77.448                           | 76.735                           | 77.844                           |
| b (Å)                               | 76.953                           | 78.328                           | 77.448                           | 76.735                           | 77.844                           |
| c (Å)                               | 38.889                           | 37.691                           | 37.316                           | 38.981                           | 37.459                           |
| α(°)                                | 90.0                             | 90.0                             | 90.0                             | 90.0                             | 90.0                             |
| β(°)                                | 90.0                             | 90.0                             | 90.0                             | 90.0                             | 90.0                             |
| γ(°)                                | 90.0                             | 90.0                             | 90.0                             | 90.0                             | 90.0                             |
| Observed reflections                | 54007                            | 36915                            | 68574                            | 78741                            | 29959                            |
| Unique reflections                  | 8955                             | 6962                             | 8972                             | 11577                            | 6011                             |
| Resolution (Å)                      | 34.73-1.95                       | 55.39-2.12                       | 30.86-1.90                       | 34.78-1.78                       | 33.78-2.22                       |
|                                     | (1.98-1.95)                      | (2.16-2.12)                      | (1.93-1.90)                      | (1.81-1.78)                      | (2.26-2.22)                      |
| Completeness (%)                    | 99.8 (99.8)                      | 98.3 (97.2)                      | 95.0 (89.3)                      | 99.1 (95.0)                      | 98.8 (99.3)                      |
| Anomalous completeness (%)          | 99.5 (97.2)                      | 98.0 (90.5)                      | 94.7 (84.7)                      | 99.0 (92.5)                      | 98.6 (94.7)                      |
| R <sub>merge</sub> (%)              | 14.1 (54.6)                      | 13.2 (64.5)                      | 10.7 (65.2)                      | 12.1 (48.3)                      | 13.3 (63.9)                      |
| R <sub>pim</sub> (%)                | 6.0 (36.1)                       | 6.0 (35.8)                       | 4.4 (36.0)                       | 4.6 (27.8)                       | 6.4 (37.0)                       |
| CC <sub>1/2</sub>                   | 0.805                            | 0.752                            | 0.648                            | 0.830                            | 0.722                            |
| Cc* last shell                      | 0.951                            | 0.927                            | 0.887                            | 0.952                            | 0.916                            |
| I/σ(I)                              | 13.8 (1.5)                       | 10.4 (1.6)                       | 22.8 (1.3)                       | 19.4 (1.8)                       | 10.1 (1.3)                       |
| Multiplicity                        | 6.0 (3.1)                        | 5.3 (3.7)                        | 7.7 (4.3)                        | 6.8 (3.6)                        | 5.0 (3.5)                        |
| Total data collection time (s)      | 600                              | 375                              | 630                              | 600                              | 350                              |
| <u>Refinement</u>                   |                                  |                                  |                                  |                                  |                                  |
| Resolution (Å)                      | 34.73-1.95                       | 55.39-2.12                       | 30.86-1.90                       | 34.78-1.78                       | 33.78-2.22                       |
| N. reflections                      | 8452                             | 6574                             | 8489                             | 10927                            | 5659                             |
| N. reflections in test set          | 466                              | 359                              | 465                              | 620                              | 337                              |
| R <sub>factor</sub> (%)             | 19.2                             | 21.0                             | 15.8                             | 15.6                             | 17.4                             |
| R <sub>free</sub> (%)               | 26.0                             | 29.4                             | 21.5                             | 22.3                             | 24.9                             |
| R <sub>all</sub> (%)                | 19.6                             | 21.5                             | 16.1                             | 16.0                             | 17.9                             |
| N. non-H atoms                      | 1156                             | 1186                             | 1210                             | 1332                             | 1140                             |
| Mean B-value (Å)                    | 22.6                             | 24.7                             | 28.2                             | 20.2                             | 33.4                             |
| <u>Ramachandran plot statistics</u> |                                  |                                  |                                  |                                  |                                  |
| Most favoured (%)                   | 95.8                             | 90.1                             | 95.6                             | 95.9                             | 96.8                             |
| Additional allowed                  | 4.2                              | 7.9                              | 3.4                              | 4.1                              | 3.2                              |
| Generously allowed/ Disallowed      |                                  |                                  |                                  |                                  |                                  |
| (number of residues)                | 0                                | 2                                | 0                                | 0                                | 0                                |
| R.m.s.d. bonds (Å)                  | 0.008                            | 0.007                            | 0.008                            | 0.009                            | 0.009                            |
| R.m.s.d. angles (°)                 | 1.52                             | 1.56                             | 1.51                             | 1.56                             | 1.69                             |

Values in parenthesis refer to last resolution shell

Table S2. Intensities of peaks observed in the Fo-Fc electron density map calculated using PDB code 193L as model, just after the molecular and in the anomalous difference electron density map.

|                                                                                                                       | HEWL-1                                                                                                                                                                                                                                                                                                                                                                                                                                                                             | HEWL-1                                                                                                                                                                                                                                      | HEWL-1                                                                                                                                                                                                                                                                                                                                                                                                       | HEWL-2                                                                                                                                                                                                                                                                                                                                                        | HEWL-2                                                                                                                                                                                                                                                                                                   |
|-----------------------------------------------------------------------------------------------------------------------|------------------------------------------------------------------------------------------------------------------------------------------------------------------------------------------------------------------------------------------------------------------------------------------------------------------------------------------------------------------------------------------------------------------------------------------------------------------------------------|---------------------------------------------------------------------------------------------------------------------------------------------------------------------------------------------------------------------------------------------|--------------------------------------------------------------------------------------------------------------------------------------------------------------------------------------------------------------------------------------------------------------------------------------------------------------------------------------------------------------------------------------------------------------|---------------------------------------------------------------------------------------------------------------------------------------------------------------------------------------------------------------------------------------------------------------------------------------------------------------------------------------------------------------|----------------------------------------------------------------------------------------------------------------------------------------------------------------------------------------------------------------------------------------------------------------------------------------------------------|
|                                                                                                                       | 21 h                                                                                                                                                                                                                                                                                                                                                                                                                                                                               | 24 h                                                                                                                                                                                                                                        | 3 days                                                                                                                                                                                                                                                                                                                                                                                                       | 21 h                                                                                                                                                                                                                                                                                                                                                          | 24 h                                                                                                                                                                                                                                                                                                     |
| $\lambda$ used for data collection                                                                                    | 0.15418 nm                                                                                                                                                                                                                                                                                                                                                                                                                                                                         | 0.15418 nm                                                                                                                                                                                                                                  | 0.15418 nm                                                                                                                                                                                                                                                                                                                                                                                                   | 0.15418 nm                                                                                                                                                                                                                                                                                                                                                    | 0.15418 nm                                                                                                                                                                                                                                                                                               |
| Resolution (Å)                                                                                                        | 34.73-1.95                                                                                                                                                                                                                                                                                                                                                                                                                                                                         | 55.39-2.12                                                                                                                                                                                                                                  | 30.86-1.90                                                                                                                                                                                                                                                                                                                                                                                                   | 34.78-1.78                                                                                                                                                                                                                                                                                                                                                    | 33.78-2.22                                                                                                                                                                                                                                                                                               |
| Peaks in the Fo-Fc electron density map calculated using PDB code 193L as model, just after the molecular replacement | <p>The three gold binding sites correspond to the first, the second and the 11<sup>th</sup> peak in the Fo-Fc electron density map.</p> <p>Peak 1: 13.65 sigma=assigned to Au2</p> <p>Peak 2: 9.15 sigma=assigned to Au3</p> <p>Peak3:6.47 sigma=assigned to nitrate406</p> <p>Peak4:6.40 sigma=assigned to HOH2</p> <p>Peak5:6.39 sigma=assigned to HOH1</p> <p>Peak6:6.21 sigma=assigned to HOH3</p> <p>Peak7:6.00 sigma=assigned to EDO302</p> <p>Peak8:5.94 sigma=assigned</p> | <p>The gold binding site corresponds to the first peak in the Fo-Fc electron density map.</p> <p>Peak 1: 16.65 sigma=assigned to Au1</p> <p>The map has been calculated with an unbiased model that refines to Rfactor=31.3, Rfree=32.9</p> | <p>The three gold binding sites correspond to the first, the second and the fourth peak in the Fo-Fc electron density map.</p> <p>Peak 1: 15.25 sigma=assigned to Au2</p> <p>Peak 2: 11.07 sigma=assigned to Au1</p> <p>Peak 3: 8.79 sigma=assigned to HOH1</p> <p>Peak 4: 7.59 sigma=assigned to Au3</p> <p>The map has been calculated with an unbiased model that refines to Rfactor=31.3, Rfree=32.9</p> | <p>The three gold binding sites correspond to the first, the second and third peak in the Fo-Fc electron density map.</p> <p>Peak 1: 19.83 sigma=assigned to Au2</p> <p>Peak 2: 15.16 sigma=assigned to Au1</p> <p>Peak 3: 14.08 sigma=assigned to Au3</p> <p>The map has been calculated with an unbiased model that refines to Rfactor=33.7, Rfree=34.8</p> | <p>The three gold binding sites correspond to the first, the second and fourth peak in the Fo-Fc electron density map.</p> <p>Peak 1: 11.42 sigma=assigned to Au1</p> <p>Peak 2: 8.76 sigma=assigned to Au2</p> <p>Peak3:7.59 sigma=assigned to EDO201302</p> <p>Peak 4: 7.03 sigma=assigned to Au32</p> |

|                                                                                                                                      |                                                                                                                                                                                                                                                                                                |                                                                                                          |                                                                                                                                                                                                                                                                          |                                                                                                                                                                                                                                                                         |                                                                                                                                                                                                                                          |
|--------------------------------------------------------------------------------------------------------------------------------------|------------------------------------------------------------------------------------------------------------------------------------------------------------------------------------------------------------------------------------------------------------------------------------------------|----------------------------------------------------------------------------------------------------------|--------------------------------------------------------------------------------------------------------------------------------------------------------------------------------------------------------------------------------------------------------------------------|-------------------------------------------------------------------------------------------------------------------------------------------------------------------------------------------------------------------------------------------------------------------------|------------------------------------------------------------------------------------------------------------------------------------------------------------------------------------------------------------------------------------------|
|                                                                                                                                      | <p>to alternative conformation of side chain of Asp18</p> <p>Peak9:5.71 sigma=assigned to nitrate407<br/>Peak10:5.50 sigma=assigned to HOH40</p> <p>Peak 11: 5.50 sigma=assigned to Au1</p> <p>The map has been calculated with an unbiased model that refines to Rfactor=32.3, Rfree=32.1</p> |                                                                                                          |                                                                                                                                                                                                                                                                          |                                                                                                                                                                                                                                                                         |                                                                                                                                                                                                                                          |
| <p>Peaks in the anomalous difference electron density map calculated using refined PDB structures (without gold atoms) as model.</p> | <p>Au2 corresponds to the first peak in the anomalous difference electron density map (10.91 sigma); Au3 corresponds to a peak in the anomalous map at 3.2 sigma; Au1 has low anomalous signal, but this could be due to the very low occupancy of this gold binding site</p>                  | <p>Au1 corresponds to the first peak in the anomalous difference electron density map (10.91 sigma).</p> | <p>Au2 corresponds to the first peak in the anomalous difference electron density map (13.3 sigma); Au1 corresponds to the second peak in the anomalous difference electron density map at 11.7 sigma; Au3 corresponds to the third peak in the anomalous difference</p> | <p>Au2 corresponds to the first peak in the anomalous difference electron density map (18.0 sigma); Au1 corresponds to the second peak in the anomalous difference electron density map (16.8 sigma); Au3 corresponds to the third peak in the anomalous difference</p> | <p>Au1 corresponds to the first peak in the anomalous difference electron density map (5.1 sigma); Au2 corresponds to the second peak in the anomalous difference electron density map (5.1 sigma); Au3 corresponds to a peak in the</p> |

|  |  |  |                                    |                                    |                            |
|--|--|--|------------------------------------|------------------------------------|----------------------------|
|  |  |  | electron density map at 7.04 sigma | electron density map (14.7 sigma); | anomalous map at 2.9sigma; |
|--|--|--|------------------------------------|------------------------------------|----------------------------|

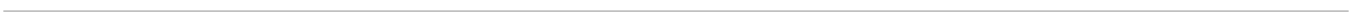

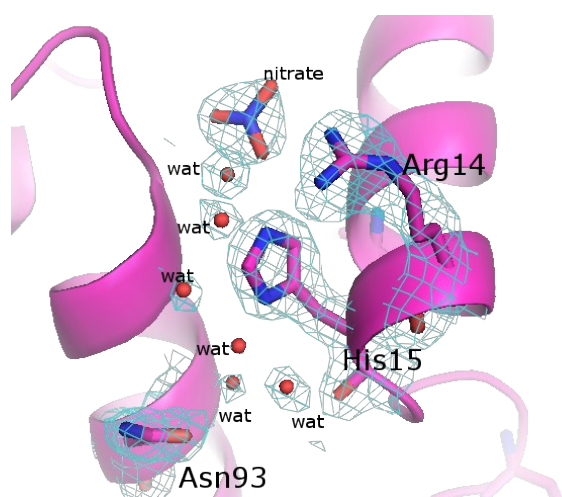

**Figure S1.** 2Fo-Fc electron density map close to the side chains of His15 and Asn93 in the structure of the adduct formed in the reaction between HEWL and **1** after 3 days of soaking. Gold atoms are not found in this structure, suggesting that the adduct has lost metal centres with time.

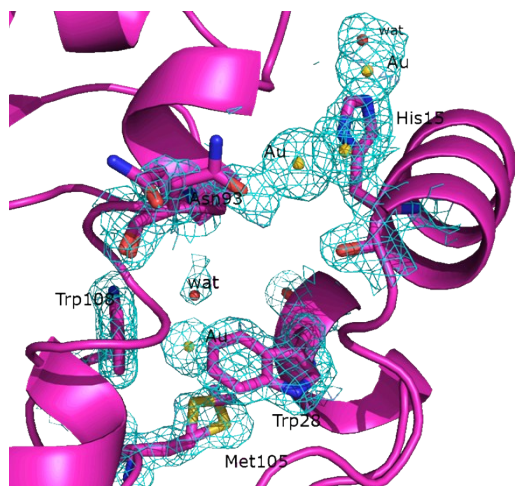

**Figure S2.** 2Fo-Fc electron density map ( $1.0\sigma$ , cyan) of the Au binding site in the structure of the adduct formed in the reaction between HEWL and **2** after 21 h of soaking.

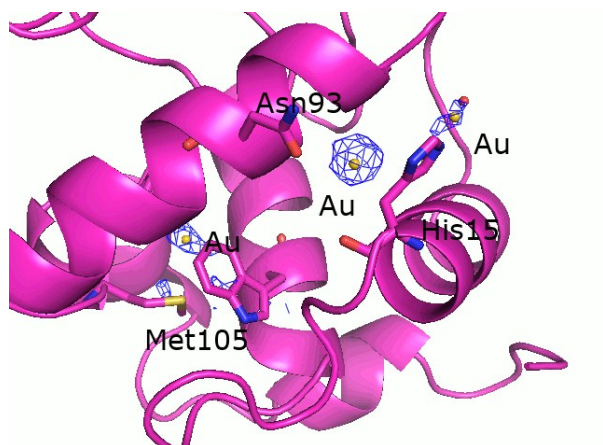

**Figure S3.** Anomalous difference electron density map ( $2.5 \sigma$ , cyan) of the Au binding sites in the structure of the adduct formed in the reaction between HEWL and **2** after 1 day of soaking.

S atoms of protein residues can be observed only in high quality anomalous difference electron density maps for data collected using CuK $\alpha$  ( $f''=0.56e^-$ ). In this respect, it is interesting to note that in our structures of HEWL adducts with **1** (24 h incubation) and **2** (21 h incubation), signals of Cys and Met can be clearly observed in the anomalous difference electron density maps. See below:

In the structure of the HEWL adduct with **2**:

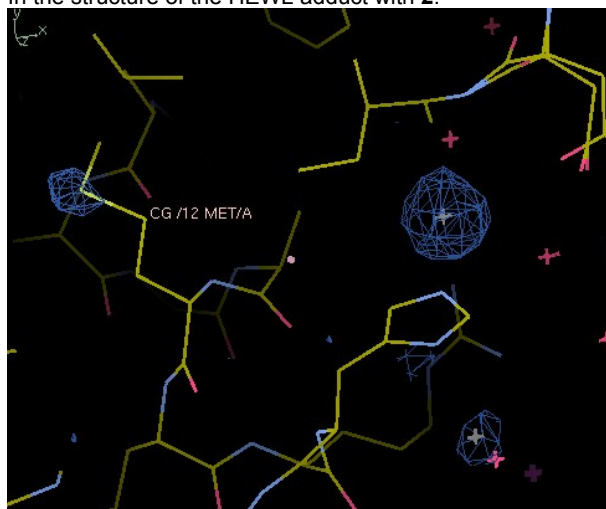

Met12 and Au

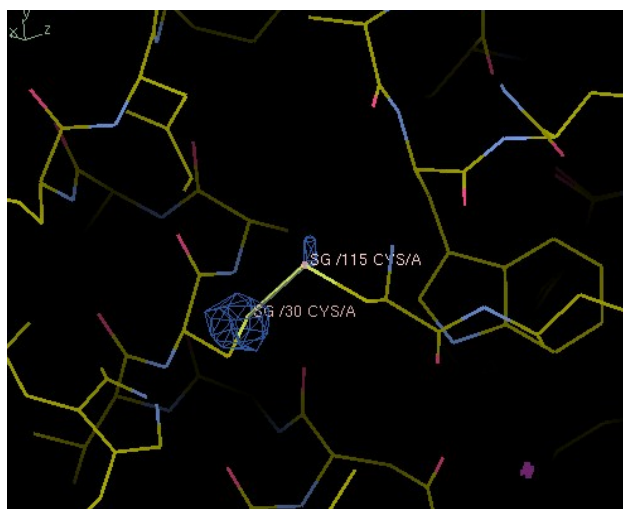

Cys30 and Cys115

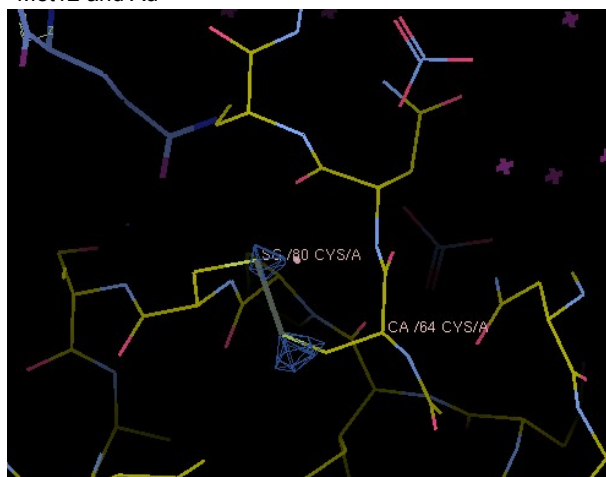

Cys64 and Cys80

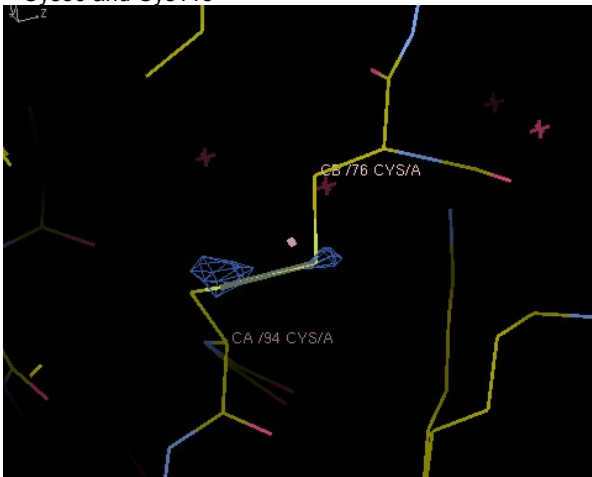

Cys76 and Cys94

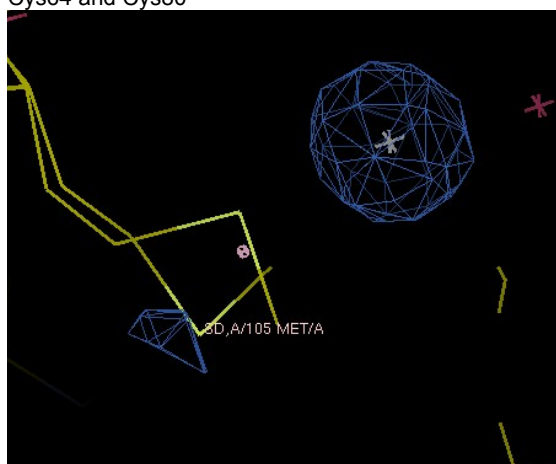

Met105 and Au

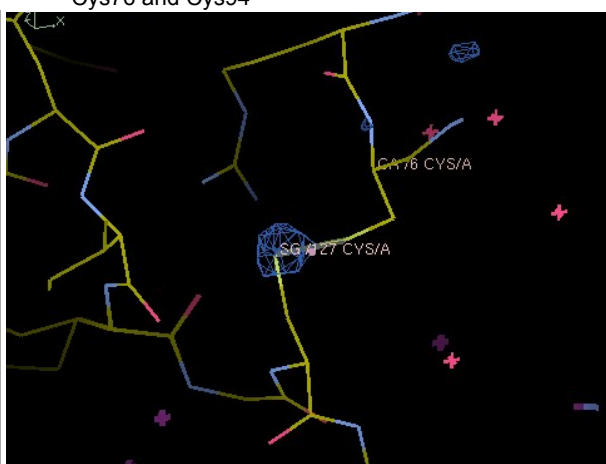

Cys127



In the structure of the HEWL adduct with 1:

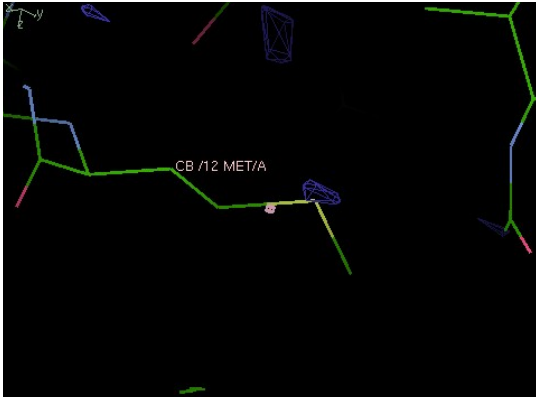

Met12

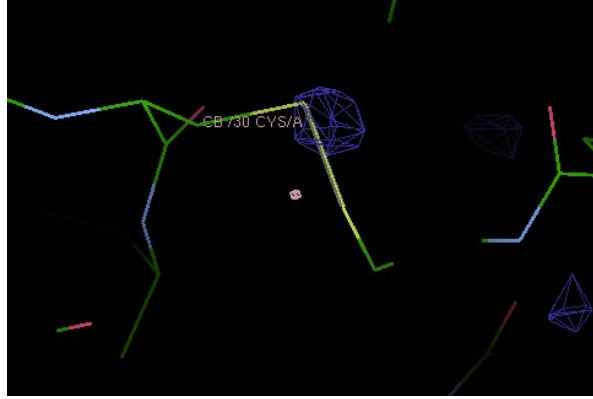

Cys30

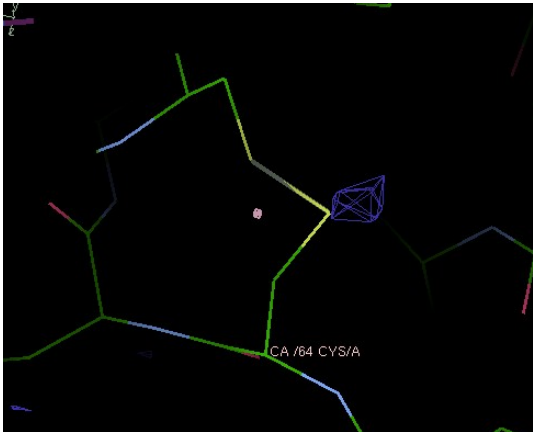

Cys64

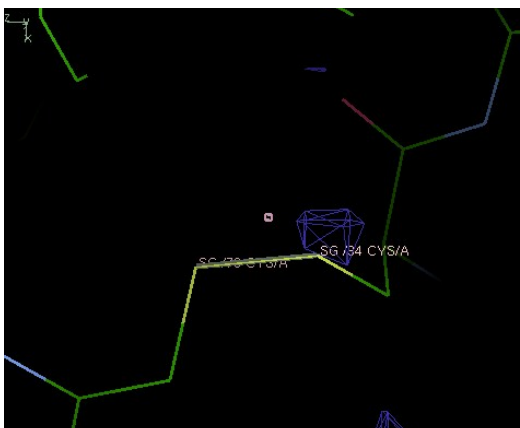

Cys94
